# Supplementary material for: Comprehensive Genomics and Proteomics Analysis Reveals the Multiple Response Strategies of Endophytic Bacillus sp. WR13 to Iron Limitation
Source: MDPI journal article supplement (doi:10.3390/microorganisms11020367), 2023-02-01
Supplement: s1 [file s1]

## Supplementary Materials

**Comprehensive Genomics and Proteomics Analysis Reveals the Multiple Response Strategies of Endophytic *Bacillus* sp. WR13 to iron limitation**

**Zonghao Yue <sup>1</sup>, Yongchuang Liu <sup>1</sup>, Yanjuan Chen <sup>2</sup>, Can Chen <sup>3</sup>, Ju Zhang <sup>3</sup>, Le He <sup>1</sup>, Keshi Ma <sup>1,\*</sup>**

<sup>1</sup> College of Life Sciences and Agronomy, Zhoukou Normal University,  
Zhoukou 466001, China

<sup>2</sup> School of Mechanical and Electrical Engineering, Zhoukou Normal University,  
Zhoukou 466001, China

<sup>3</sup> Henan Key Laboratory of Plant Molecular Breeding and Bioreactor,  
Zhoukou 466001, China

\* Correspondence: zknumks@163.com (K.M.); Tel.: +86-15896720176

## Supplementary tables

**Table S1** The primer sequences for qPCR assay in *Bacillus* sp. WR13

| Gene number | Gene name | Forword primer sequence (5'–3') | Reverse primer sequence (5'–3') | Product length (bp) |
|-------------|-----------|---------------------------------|---------------------------------|---------------------|
| Gene1997    | DhbA      | ATTGTATCTCCCGGATCAACGG          | TCCTTTTATGACTTGCTCCGCT          | 84                  |
| Gene1994    | DhbB      | CAAATGGCGCTGGACTATGC            | TTTGCCAGTGTTTGCTGACG            | 120                 |
| Gene1996    | DhbC      | ATCGCTGCATTTGACATCGC            | CAAACGTGTAGCCATGCGAG            | 89                  |
| Gene1995    | DhbE      | AGTCCAGATGACGCATTTCTT           | TCCATCCATACCATCGCAAGAG          | 86                  |
| Gene1993    | DhbF      | CACCAAACGGGATGGAAGGA            | CGCATCAATCGGTCAGCAAG            | 88                  |
| Gene3634    | FeuA      | AGACGCGAAATTGCTTGACG            | TCTCCGGTTGGTTTGGCTTT            | 105                 |
| Gene3635    | FeuB      | AATTGCGTTTGTCTGGGTTGG           | CTTGCGAGATCACACAGGGT            | 126                 |
| Gene3636    | FeuC      | AGCGGTTTAATCGGGATGCT            | ATCGCCAAAATGATGCCTGC            | 98                  |
| Gene2093    | YusV      | TATCATCCTTCTTGACGAGCCG          | TCGTCCGGTCTTCCTTTTCATT          | 101                 |
| Gene0846    | BcbE      | GAAAGTGAACAATGCGGAACCA          | GCAAAACGCCGAGAGTATGAAA          | 135                 |
| Gene1998    | BesA      | AAAAGCCGGATGAACGACAATG          | GGCTGACCAAAACAGGAAGAAC          | 133                 |
| Gene4093    | RplB      | TCTGCTTGCCGTGCTTCTAT            | ACCGTGTGGGTGATCGTTAG            | 144                 |

**Table S2** The assembled results of *Bacillus* sp. WR13 genome

| Scaffold ID | Length (bp) | GC content (%) | Sequence Type |
|-------------|-------------|----------------|---------------|
| Scaffold1   | 961598      | 43.48          | Chromosome    |
| Scaffold2   | 890688      | 43.25          | Chromosome    |
| Scaffold3   | 704946      | 43.96          | Chromosome    |
| Scaffold4   | 362198      | 44.41          | Chromosome    |
| Scaffold5   | 285834      | 45.33          | Chromosome    |
| Scaffold6   | 224470      | 43.23          | Chromosome    |
| Scaffold7   | 209767      | 45.05          | Chromosome    |
| Scaffold8   | 159218      | 40.98          | Chromosome    |
| Scaffold10  | 64989       | 42.16          | Chromosome    |
| Scaffold11  | 59668       | 42.33          | Chromosome    |
| Scaffold12  | 55306       | 42.62          | Chromosome    |
| Scaffold13  | 15806       | 41.78          | Chromosome    |
| Scaffold15  | 10388       | 45.93          | Chromosome    |
| Scaffold17  | 4208        | 53.27          | Chromosome    |
| Scaffold16  | 4903        | 34.18          | Plasmid       |
| Scaffold18  | 707         | 57.99          | Plasmid       |
| Scaffold20  | 557         | 55.66          | Plasmid       |
| Scaffold9   | 118711      | 34.85          | Plasmid       |
| Scaffold14  | 13104       | 44.73          | Plasmid       |
| Scaffold19  | 657         | 49.92          | Plasmid       |
| Scaffold21  | 515         | 52.23          | Plasmid       |
| Scaffold22  | 509         | 58.35          | Plasmid       |
| Scaffold23  | 460         | 55.77          | Plasmid       |
| Scaffold24  | 325         | 56             | Plasmid       |
| Scaffold25  | 300         | 45.67          | Plasmid       |

**Table S3** Genome statistical information for *Bacillus* sp. WR13.

| Attribute              | Value     |
|------------------------|-----------|
| Total Genome Size (bp) | 4,149,832 |
| Raw pair reads         | 3,567,158 |
| Clean pair reads       | 3,506,381 |
| Clean Data Q20 (%)     | 96.82     |
| GC Content (%)         | 43.4      |
| Chromosome             |           |
| Chromosome Size (bp)   | 4,009,084 |
| Number of Scaffolds    | 14        |
| CDs Number             | 4,094     |
| Pseudo genes           | 88        |
| rRNA genes             | 4         |
| tRNA genes             | 40        |
| ncRNA genes            | 5         |

**Table S4** Summary of the protein annotations in four databases

| Data base   | Protein number | Percentage |
|-------------|----------------|------------|
| GO          | 396            | 85.53%     |
| KEGG        | 390            | 84.23%     |
| COG         | 427            | 92.22%     |
| Pfam        | 432            | 93.30%     |
| Total       | 463            | 100.00%    |
| annotations |                |            |

## Supplementary figures

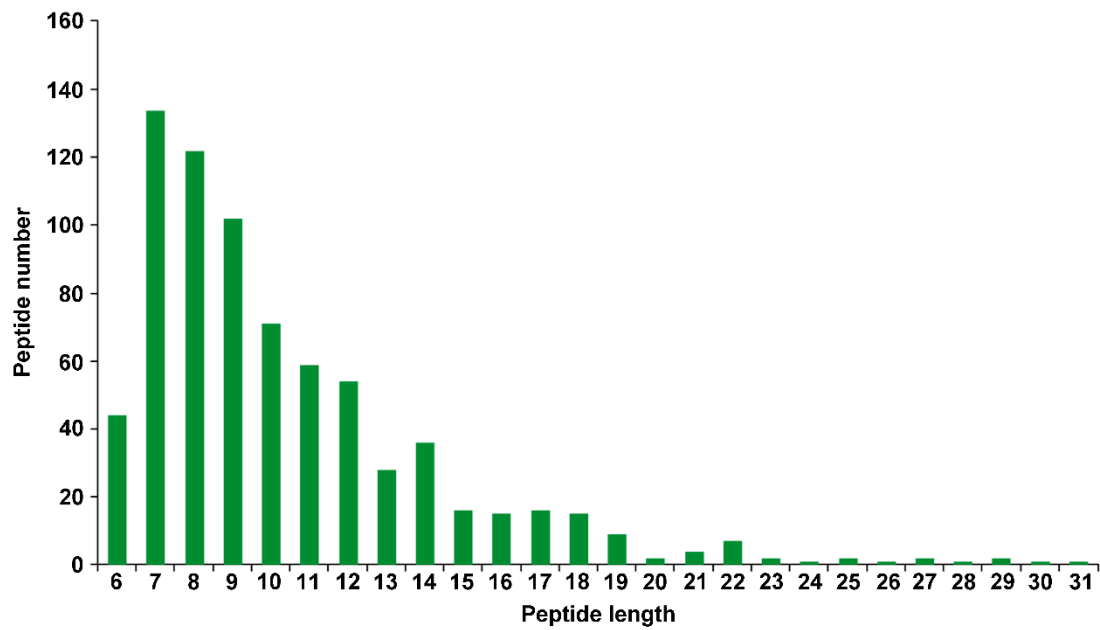

**Figure. S1** Distribution of peptide length of the identified proteins in WR13 grown under Fe-sufficient (Fe+) and Fe-deficient (Fe-) conditions.

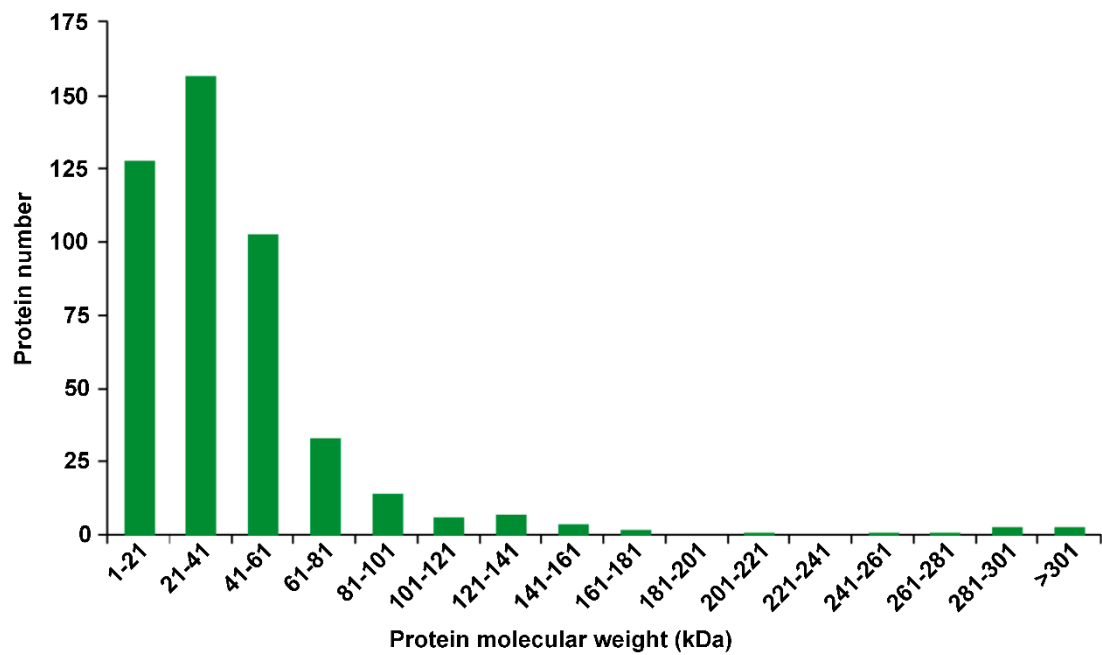

**Figure. S2** Distribution of molecular weight of the identified proteins in WR13 grown under Fe-sufficient (Fe+) and Fe-deficient (Fe-) conditions.
